# Supplementary material for: Redox flexibility in a germanium hydride manifold: hydrogen shuttlingviaoxidative addition and reductive elimination
Source: Royal Society of Chemistry journal article supplement (doi:10.1039/d3cc01411h), 2023-01-01
Supplement: d3cc01411h1.pdf [file d3cc01411h1.pdf]

## Redox flexibility in a germanium hydride manifold: hydrogen shuttling via oxidative addition and reductive elimination

Alexa Caise, Jamie Hicks, Andreas Heilmann, Simon Aldridge

### Supplementary Information

#### Table of Contents (15 pages)

|       |                                                                 |     |
|-------|-----------------------------------------------------------------|-----|
| (i)   | General considerations                                          | s2  |
| (ii)  | Starting materials                                              | s2  |
| (iii) | Novel compounds                                                 | s3  |
| (iv)  | $^1\text{H}$ and $^{13}\text{C}$ NMR spectra of novel compounds | s6  |
| (v)   | X-ray crystallographic studies                                  | s11 |
| (vi)  | References                                                      | s15 |

### (i) General considerations

All manipulations were carried out using standard Schlenk line or dry-box techniques under an atmosphere of dry argon or dinitrogen. Solvents were degassed by sparging with argon and dried by passing through a column of the appropriate drying agent using a commercially available Braun SPS and stored over potassium. Diethyl ether and THF were dried over and distilled from sodium and benzophenone/potassium (respectively) and stored over a potassium mirror or sodium mirror, respectively. NMR spectra were measured in benzene- $d_6$  which was dried over  $CaH_2$ , with the solvent then being distilled under reduced pressure, degassed by three freeze-pump-thaw cycles and stored under argon in Teflon valve ampoules. NMR samples were prepared under argon in 5 mm Wilmad 507-PP tubes fitted with J. Young Teflon valves. NMR spectra were measured on a Bruker Avance III HD Nanobay 400 MHz NMR spectrometer equipped with a 9.4 T magnet, Bruker Avance III 500 MHz NMR spectrometer equipped with a 11.75 T magnet or a Bruker Avance III NMR 500 MHz NMR spectrometer equipped with a 11.75 T magnet and a  $^{13}C$  detect cryoprobe.  $^1H$  and  $^{13}C$  NMR spectra were referenced internally to residual protio-solvent ( $^1H$ ) or solvent ( $^{13}C$ ) resonances and are reported relative to tetramethylsilane ( $\delta = 0$  ppm). Chemical shifts are quoted in  $\delta$  (ppm) and coupling constants in Hz. Infra-red spectra were measured on a Nicolet 500 FT-IR spectrometer. Samples were measured as a Nujol mull and were prepared inside a glovebox before being sealed in an airtight cell. Elemental analyses were carried out at London Metropolitan University or by Elemental Microanalysis Ltd., Okehampton, Devon.  $K[HBEt_3]$  and  $K[OC(O)H]$  were used as received (Aldrich);  $CO_2$  was dried over  $P_2O_5$  prior to use.

### (ii) Starting materials

The synthesis of  $[2,6-(iPr_2NCH_2)_2C_6H_3]GeCl$  was carried out as per literature precedent.<sup>s1</sup> The preparation of  $K[(O(C_{10}H_7-1))]$  is outlined below. All other reagents were used as received.

**Preparation of  $K[(O(C_{10}H_7-1))]$  ( $K[ONaph]$ ):** To a slurry of KH (0.33 g, 8.23 mmol) in tetrahydrofuran (THF) (7 mL) at room temperature was added a solution of 1-naphthol (1.00 g, 6.94 mmol), also in THF. Hydrogen evolution was observed and the resulting slurry was stirred overnight at room temperature and subsequently filtered. Volatiles were removed *in vacuo* and the resulting solid was washed with a portion of pentane (10 mL) and dried thoroughly *in vacuo* to yield a white powder.

### (iii) Novel compounds

**Synthesis of  $[(2,6\text{-}i\text{PrN}_2\text{CH}_2)_2\text{C}_6\text{H}_3]\text{Ge}(\text{H})_3$  ( $(\text{Ar}^{\text{NiPr}_2}\text{Ge}(\text{H}))_3$ , **2**):** Method A (from **1**): To a Schlenk tube containing  $\text{Ar}^{\text{NiPr}_2}\text{GeCl}$  (**1**; 1.50 g, 3.64 mmol) and  $\text{K}[\text{HBEt}_3]$  (0.60 g, 4.34 mmol) was added toluene (7 mL). The resulting pale yellow solution was stirred at room temperature for 3 h, during which time a fine precipitate was evolved. Volatiles were subsequently removed *in vacuo*, yielding a bright yellow powder, which was extracted with *n*-hexane (50 mL) and filtered. The solution was then concentrated until the incipient point of crystallisation and stored overnight at 6°C, producing small colourless crystals. More crystals were then produced by storing the solution overnight at -30°C; the crystals were then isolated and dried *in vacuo*. Yield: 0.49 g (36%). Crystals of **2** which were suitable for X-ray crystallography were obtained by storage of a concentration solution of **2** in toluene at -30°C for 3 d. Method B (from **3**): To a solution of  $\text{Ar}^{\text{NiPr}_2}\text{Ge}(\text{ONaph})$  (**3**; 0.03 g, 0.06 mmol) in benzene- $d_6$  (0.5 mL) was added pinacolborane (HBpin) (15  $\mu\text{L}$ , 0.10 mmol). The resulting solution was shaken vigorously and the reaction monitored by  $^1\text{H}$  and  $^{11}\text{B}\{^1\text{H}\}$  NMR spectroscopy until the consumption of **3** (and formation of **2**) reached >95% completion (*ca.* 6 h). The  $^1\text{H}$  NMR spectrum of the product is consistent with that of **2** when prepared by Method A. The identity of the co-product (Naph)OBpin was confirmed by removal of volatiles *in vacuo*, followed by redissolving the resulting solid in  $\text{CDCl}_3$  and analysis of the resulting solution by  $^1\text{H}$  and  $^{11}\text{B}\{^1\text{H}\}$  NMR spectroscopy; the data are consistent with those reported by Bertrand *et al.*<sup>s2</sup> Method C (from **4**): To a solution of  $\text{Ar}^{\text{NiPr}_2}\text{Ge}\{\text{OC}(\text{O})\text{H}\}$  (**4**; 0.03 g, 0.07 mmol) in benzene- $d_6$  (0.5 mL) was added pinacolborane (HBpin) (50  $\mu\text{L}$ , 0.34 mmol). The resulting solution immediately evolved a pale yellow colour and was analysed (within 5 min) by  $^1\text{H}$  and  $^{11}\text{B}\{^1\text{H}\}$  NMR spectroscopy. The spectra showed complete conversion of **4** to **2**; the  $^1\text{H}$  NMR spectrum of the product is consistent with that of **2** when prepared by Method A. The data obtained for the co-product  $\text{HC}(\text{O})\text{OBpin}$  are consistent with those reported in the literature.<sup>s3</sup> **Spectroscopic data:**  $^1\text{H}$  NMR (400 MHz, benzene- $d_6$ , 298 K):  $\delta_{\text{H}}$  0.86 (6H, d,  $^3J_{\text{HH}} = 6.7$  Hz,  $\text{CH}_3$  of  $i\text{Pr}$ ), 0.93 (6H, d,  $^3J_{\text{HH}} = 6.7$  Hz,  $\text{CH}_3$  of  $i\text{Pr}$ ), 0.96 (12H, d,  $^3J_{\text{HH}} = 6.6$  Hz,  $\text{CH}_3$  of  $i\text{Pr}$ ), 1.00 (12H, d,  $^3J_{\text{HH}} = 6.6$  Hz,  $\text{CH}_3$  of  $i\text{Pr}$ ), 1.14 (6H, d,  $^3J_{\text{HH}} = 6.7$  Hz,  $\text{CH}_3$  of  $i\text{Pr}$ ), 1.18 (6H, d,  $^3J_{\text{HH}} = 6.7$  Hz,  $\text{CH}_3$  of  $i\text{Pr}$ ), 1.21 – 1.62 (12H, m (br.),  $\text{CH}_3$  of  $i\text{Pr}$ ), 2.99 (4H, d,  $^3J_{\text{HH}} = 6.7$  Hz,  $\text{CH}$  of  $i\text{Pr}$ ), 3.13 (4H, d,  $^3J_{\text{HH}} = 6.7$  Hz,  $\text{CH}$  of  $i\text{Pr}$ ), 3.32 (4H, d,  $^3J_{\text{HH}} = 6.7$  Hz,  $\text{CH}$  of  $i\text{Pr}$ ), 3.47 and 3.80 (4H, AB system,  $^2J_{\text{HH}} = 16.3$  Hz,  $\text{CH}_2\text{N}$ ), 3.37 and 3.91 (2H, AB system,  $^2J_{\text{HH}} = 14.7$  Hz,  $\text{CH}_2\text{N}$ ), 4.08 and 4.26 (2H, AB system,  $^2J_{\text{HH}} = 14.5$  Hz,  $\text{CH}_2\text{N}$ ), 4.40 – 4.67 (2H, m (br.)  $\text{CH}_2\text{N}$ ), 4.70 (1H, d,  $^3J_{\text{HH}} = 7.1$  Hz,  $\text{GeH}$ ), 4.88 (1H, d,  $^3J_{\text{HH}} = 9.7$  Hz,  $\text{GeH}$ ), 4.99 (1H, dd,  $^3J_{\text{HH}} = 9.7, 7.1$  Hz,  $\text{GeH}$ ), 5.01 – 5.16 (2H, m (br.)  $\text{CH}_2\text{N}$ ), 7.15 – 7.18 (2H, m,  $\text{CH}$  of Ar), 7.23 – 7.29 (1H, m,  $\text{CH}$  of Ar), 7.34 – 7.40 (2H, m,  $\text{CH}$  of Ar), 7.88 (2H, d,  $^3J_{\text{HH}} = 7.7$  Hz,  $\text{CH}$  of Ar), 7.92 – 8.01 (2H, m (br.),  $\text{CH}$  of Ar). Broad resonances for  $\text{CH}_3$  of  $i\text{Pr}$  (12H) and  $\text{CH}$  of  $i\text{Pr}$  (4H) are obscured.  $^{13}\text{C}\{^1\text{H}\}$  NMR (101 MHz, benzene- $d_6$ , 298K):  $\delta_{\text{C}}$  20.2 ( $\text{CH}_3$  of  $i\text{Pr}$ ), 20.7 ( $\text{CH}_3$  of  $i\text{Pr}$ ), 20.9 ( $\text{CH}_3$  of  $i\text{Pr}$ ), 21.5 ( $\text{CH}_3$  of  $i\text{Pr}$ ), 22.0 (2 overlapping signals, ( $\text{CH}_3$  of  $i\text{Pr}$ ), 22.6 ( $\text{CH}_3$  of  $i\text{Pr}$ ), 48.3 ( $\text{CH}$  of  $i\text{Pr}$ ), 48.4 ( $\text{CH}$  of  $i\text{Pr}$ ), 50.4 ( $\text{CH}_2\text{N}$ ), 51.9 (br.,  $\text{CH}_2\text{N}$ ), 52.7 ( $\text{CH}$  of  $i\text{Pr}$ ), 53.6 ( $\text{CH}$  of  $i\text{Pr}$ ), 56.9 ( $\text{CH}_2\text{N}$ ), 57.0 ( $\text{CH}_2\text{N}$ ), 123.3 (ArC), 123.7 (ArC), 125.9 (ArC), 127.1 (ArC), 128.5 (ArC), 134.7 (ArC), 137.7 (ArC), 145.5 (ArC), 145.7 (ArC), 148.0 (ArC), 148.4 (ArC), 161.4 (ArC). IR (nujol/ $\text{cm}^{-1}$ ):  $\nu_{\text{Ge-H}}$  1981, 2003, 2042  $\text{cm}^{-1}$  **Elemental microanalysis:** calc. for  $\text{C}_{60}\text{H}_{108}\text{N}_6\text{Ge}_3$  C 63.69%, H 9.62%, N 7.43%, meas. C 63.58%, H 9.65%, N 7.45%.

**Synthesis of {2,6-(*i*-PrN<sub>2</sub>CH<sub>2</sub>)<sub>2</sub>C<sub>6</sub>H<sub>3</sub>}Ge(O(C<sub>10</sub>H<sub>7</sub>-1)) (Ar<sup>NiPr<sub>2</sub></sup>Ge(ONaph), **3**):** To a Schlenk tube containing Ar<sup>NiPr<sub>2</sub></sup>GeCl (0.50 g, 1.22 mmol) and K[O(C<sub>10</sub>H<sub>7</sub>-1)] (K[ONaph]) (0.29 g, 1.59 mmol) was added tetrahydrofuran (THF) (5 mL). The solution was stirred overnight at room temperature before volatiles were removed *in vacuo* and the resulting yellow powder treated with pentane (5 mL). Volatiles were again removed *in vacuo* and the product extracted into pentane (10 mL) and separated from the insoluble residue by filtration. The resulting solution was concentrated to the point of incipient crystallisation and stored at room temperature overnight, yielding colourless crystals of **3** which were suitable for X-ray crystallography. Yield: 0.44 g (70%). **Spectroscopic data:** <sup>1</sup>H NMR (400 MHz, benzene-d<sub>6</sub>, 298 K): δ<sub>H</sub> 0.91 (12H, d, <sup>3</sup>J<sub>HH</sub> = 6.7 Hz, CH<sub>3</sub> of *i*Pr), 1.00 (12H, d, <sup>3</sup>J<sub>HH</sub> = 6.6 Hz, CH<sub>3</sub> of *i*Pr), 3.22 (4H, d, <sup>3</sup>J<sub>HH</sub> = 6.7 Hz, CH of *i*Pr), 3.77 and 4.04 (4H, AB system, <sup>2</sup>J<sub>HH</sub> = 15.0 Hz, CH<sub>2</sub>N), 7.07 (2H, d, <sup>3</sup>J<sub>HH</sub> = 7.5 Hz, *m*-CH of Ar), 7.20 – 7.30 (3H, m, CH of Naph and *p*-CH of Ar), 7.36 (1H, d, <sup>3</sup>J<sub>HH</sub> = 8.2 Hz, CH of Naph), 7.51 (1H, t, <sup>3</sup>J<sub>HH</sub> = 7.9 Hz, CH of Naph), 7.73 (2H, apparent t, <sup>3</sup>J<sub>HH</sub> = 9.0 Hz, CH of Naph) and 8.52 (1H, d, <sup>3</sup>J<sub>HH</sub> = 8.2 Hz, CH of Naph). <sup>13</sup>C{<sup>1</sup>H} NMR (101 MHz, benzene-d<sub>6</sub>, 298K): δ<sub>C</sub> 20.1, 21.1 (CH<sub>3</sub> of *i*Pr), 51.4 (CH of *i*Pr), 53.7 (CH<sub>2</sub>N), 109.6 (ArC of Naph), 117.5 (ArC of Naph), 123.5 (*m*-ArC of Ar<sup>NiPr<sub>2</sub></sup>), 124.1 (2 overlapping resonances, ArC of Naph), 126.0 (ArC of Naph), 127.0 (ArC of Naph), 128.0 (ArC of Naph), 128.4 (*p*-ArC of Ar<sup>NiPr<sub>2</sub></sup>), 129.6 (ArC of Naph), 136.2 (ArC of Naph), 148.8 (*o*-ArC of Ar<sup>NiPr<sub>2</sub></sup>), 157.4 (*ipso*-ArC of Ar<sup>NiPr<sub>2</sub></sup>) and 160.0 (ArC of Naph). **Elemental microanalysis:** calc. for C<sub>30</sub>H<sub>42</sub>N<sub>2</sub>OGe C 69.39%, H 8.15%, N 5.39%, meas. C 69.18%, H 8.00%, N 5.55%.

**Synthesis of {2,6-(*i*-PrN<sub>2</sub>CH<sub>2</sub>)<sub>2</sub>C<sub>6</sub>H<sub>3</sub>}Ge{OC(O)H} (Ar<sup>NiPr<sub>2</sub></sup>Ge{OC(O)H}, **4**):** Method A: To a Schlenk tube containing **1** (0.50 g, 1.21 mmol) and K[OC(O)H] (0.13 g, 1.55 mmol) was added THF (5 mL). After stirring the slurry overnight at room temperature, volatiles were removed *in vacuo* and the resulting oily residue treated with pentane (10 mL). Filtration of the resulting slurry, followed by concentration and storage of the pale yellow solution at room temperature overnight, yielded colourless crystals of **4** which were suitable for X-ray crystallography. Yield: 0.42 g (82%). Method B: A solution of **2** (0.02 g, 0.018 mmol) in benzene-d<sub>6</sub> (0.5 mL) in an NMR tube fitted with a J. Young's valve was degassed by three freeze-pump-thaw cycles, back-filled with carbon dioxide (*ca.* 1 bar) and shaken vigorously. The reaction was monitored by <sup>1</sup>H NMR spectroscopy until it reached completion; the <sup>1</sup>H NMR spectrum of the product is consistent with that of **4** prepared by Method A. **Spectroscopic data:** <sup>1</sup>H NMR (400 MHz, benzene-d<sub>6</sub>, 298 K): δ<sub>H</sub> 1.00 (12H, d, <sup>3</sup>J<sub>HH</sub> = 6.7 Hz, CH<sub>3</sub> of *i*Pr), 1.05 (12H, d, <sup>3</sup>J<sub>HH</sub> = 6.7 Hz, CH<sub>3</sub> of *i*Pr), 3.23 (4H, sept, <sup>3</sup>J<sub>HH</sub> = 6.7 Hz, CH of *i*Pr), 3.69 and 3.88 (4H, AB system, <sup>2</sup>J<sub>HH</sub> = 15.1 Hz, CH<sub>2</sub>N), 6.98 (2H, d, <sup>3</sup>J<sub>HH</sub> = 7.5 Hz, *m*-CH of Ar), 7.17 (1H, t, <sup>3</sup>J<sub>HH</sub> = 7.5 Hz, *p*-CH of Ar), 8.84 ppm (1H, s, OC(O)H). <sup>13</sup>C{<sup>1</sup>H} NMR (101 MHz, benzene-d<sub>6</sub>, 298 K): δ<sub>C</sub> 20.5, 20.8 (CH<sub>3</sub> of *i*Pr), 51.5 (CH of *i*Pr), 53.9 (CH<sub>2</sub>N), 123.3 (*m*-ArC), 128.6 (*p*-ArC), 148.7 (*o*-ArC), 156.6 (*ipso*-ArC) and 166.0 (OC(O)H). **IR** (nujol/cm<sup>-1</sup>): ν<sub>C=O</sub> 1656. **Elemental microanalysis:** calc. for C<sub>21</sub>H<sub>36</sub>N<sub>2</sub>O<sub>2</sub>Ge C 59.89%, H 8.62%, N 6.65%, meas. C 59.97%, H 8.79%, N 6.67%.

**Synthesis of [{2,6-(*i*-PrN<sub>2</sub>CH<sub>2</sub>)<sub>2</sub>C<sub>6</sub>H<sub>3</sub>}Ge(H)<sub>2</sub>][B(C<sub>6</sub>F<sub>5</sub>)<sub>4</sub>] ([Ar<sup>NiPr<sub>2</sub></sup>Ge(H)<sub>2</sub>][B(C<sub>6</sub>F<sub>5</sub>)<sub>4</sub>], **5**):** A mixture of **2** (0.08 g, 0.07 mmol) and [Ph<sub>3</sub>C][B(C<sub>6</sub>F<sub>5</sub>)<sub>4</sub>] (0.11 g, 0.12 mmol, 1.8 equiv.) was dissolved in 1,2-difluorobenzene, resulting in a bright orange solution which was stirred at room temperature for 36 h. After filtration, bright yellow crystals of **5** (as the hexane hemi-solvate) suitable for X-ray crystallography

were obtained from a 1,2-difluorobenzene/hexane layering at room temperature. Yield: 40 mg (52%).

**Spectroscopic data:**  $^1\text{H NMR}$  (400 MHz, bromobenzene- $d_5$ , 298 K):  $\delta_{\text{H}}$  0.76 (12H, d,  $^3J_{\text{HH}} = 6.5$  Hz,  $\text{CH}_3$  of  $i\text{Pr}$ ), 0.77 (12H, d,  $^3J_{\text{HH}} = 6.5$  Hz,  $\text{CH}_3$  of  $i\text{Pr}$ ), 2.87 (4H, sept,  $^3J_{\text{HH}} = 6.5$  Hz,  $\text{CH}$  of  $i\text{Pr}$ ), 3.45 (4H, s,  $\text{CH}_2\text{N}$ ), 5.92 (2H, s, Ge-H), 6.88 (2H, d,  $^3J_{\text{HH}} = 7.6$  Hz,  $m\text{-CH}$  of Ar), 7.30 (1H, t,  $^3J_{\text{HH}} = 7.6$  Hz,  $p\text{-CH}$  of Ar).  $^{13}\text{C}\{^1\text{H}\}$  NMR (151 MHz, bromobenzene- $d_5$ , 298 K):  $\delta_{\text{C}}$  17.2, 19.1 ( $\text{CH}_3$  of  $i\text{Pr}$ ), 49.5 ( $\text{CH}_2\text{N}$ ), 54.7 ( $\text{CH}$  of  $i\text{Pr}$ ), 121.2 ( $ipso\text{-ArC}$  of  $\text{Ar}^{\text{NiPr}_2}$ ), 123.2 ( $m\text{-ArC}$  of  $\text{Ar}^{\text{NiPr}_2}$ ), 124.2 (br. m,  $ipso\text{-C}$  of  $\text{B}(\text{C}_6\text{F}_5)$ ), 133.5 ( $p\text{-ArC}$  of  $\text{Ar}^{\text{NiPr}_2}$ ), 136.4 (br. d,  $^1J_{\text{CF}} = 250$  Hz,  $m\text{-CF}$  of  $\text{B}(\text{C}_6\text{F}_5)$ ), 138.3 (d of t,  $^1J_{\text{CF}} = 248$  Hz,  $p\text{-CF}$  of  $\text{B}(\text{C}_6\text{F}_5)$ ), 143.8 ( $o\text{-ArC}$  of  $\text{Ar}^{\text{NiPr}_2}$ ), 148.5 (br. d,  $^1J_{\text{CF}} = 242$  Hz,  $o\text{-CF}$  of  $\text{B}(\text{C}_6\text{F}_5)$ ).  $^{11}\text{B}\{^1\text{H}\}$  NMR (128 MHz, bromobenzene- $d_5$ , 298 K):  $\delta_{\text{C}} -15.9$ .  $^{19}\text{F}\{^1\text{H}\}$  NMR (377 MHz, bromobenzene- $d_5$ , 298 K):  $-131.4$  (2F, br. d,  $^3J_{\text{FF}} = 12.2$  Hz,  $o\text{-CF}$ ),  $-161.8$  (1F, t,  $^3J_{\text{FF}} = 21.0$  Hz,  $p\text{-CF}$ ),  $-165.7$  (2F, br. m,  $m\text{-CF}$ ). IR (nujol/ $\text{cm}^{-1}$ ):  $\nu_{\text{Ge-H}}$  2162, 2179.

(iv)  $^1\text{H}$  and  $^{13}\text{C}$  NMR spectra of novel compounds

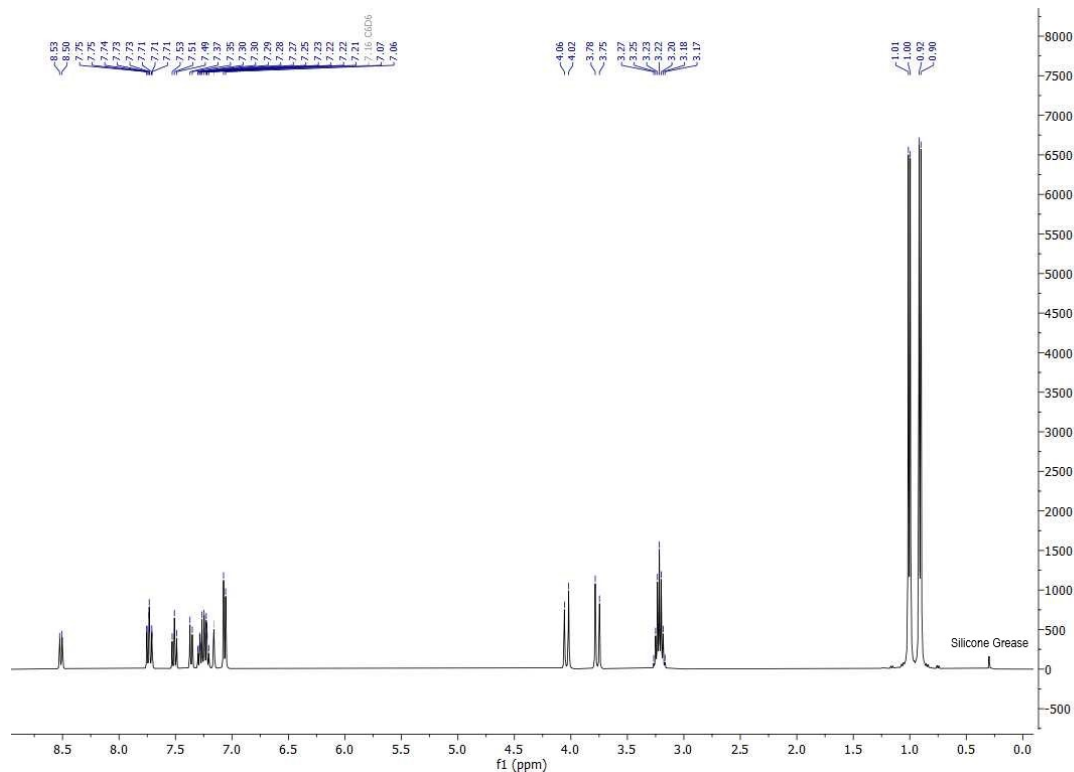

**Figure s1.**  $^1\text{H}$  NMR spectrum of  $\text{Ar}^{\text{NiPr}_2}\text{Ge}(\text{ONaph})$  measured in benzene- $\text{d}_6$  at 298 K. Silicone grease impurity has been labelled.

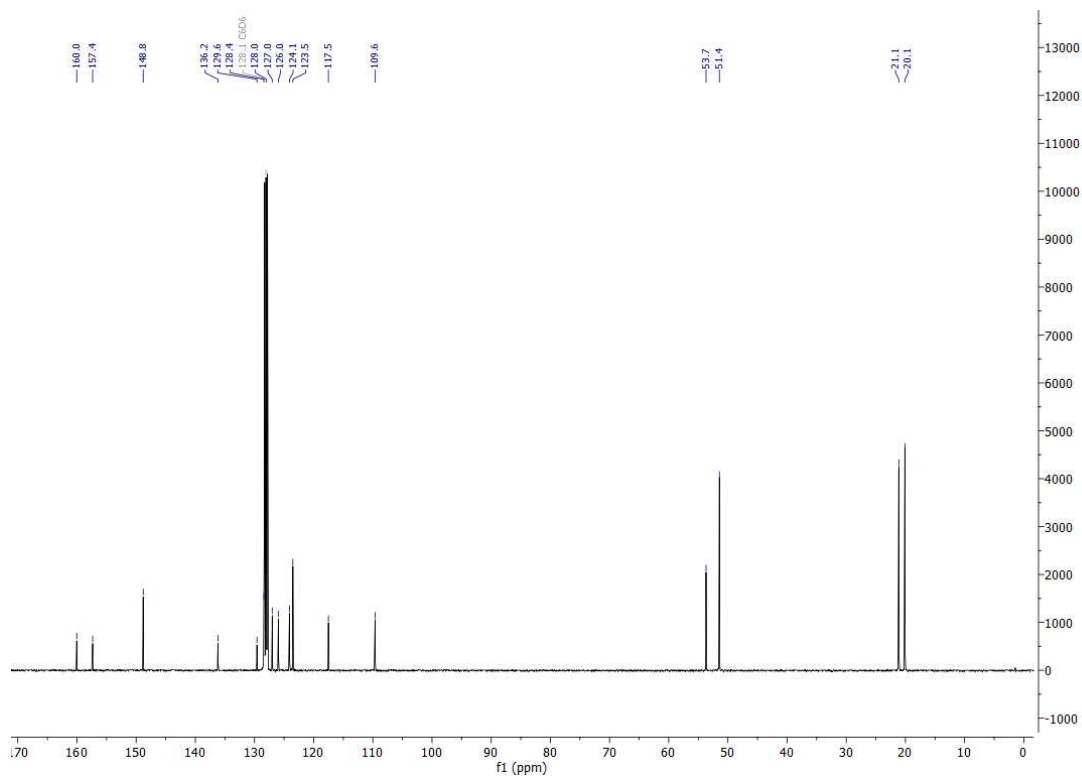

**Figure s2.**  $^{13}\text{C}\{^1\text{H}\}$  NMR spectrum of  $\text{Ar}^{\text{NiPr}_2}\text{Ge}(\text{ONaph})$  measured in benzene- $\text{d}_6$  at 298 K.

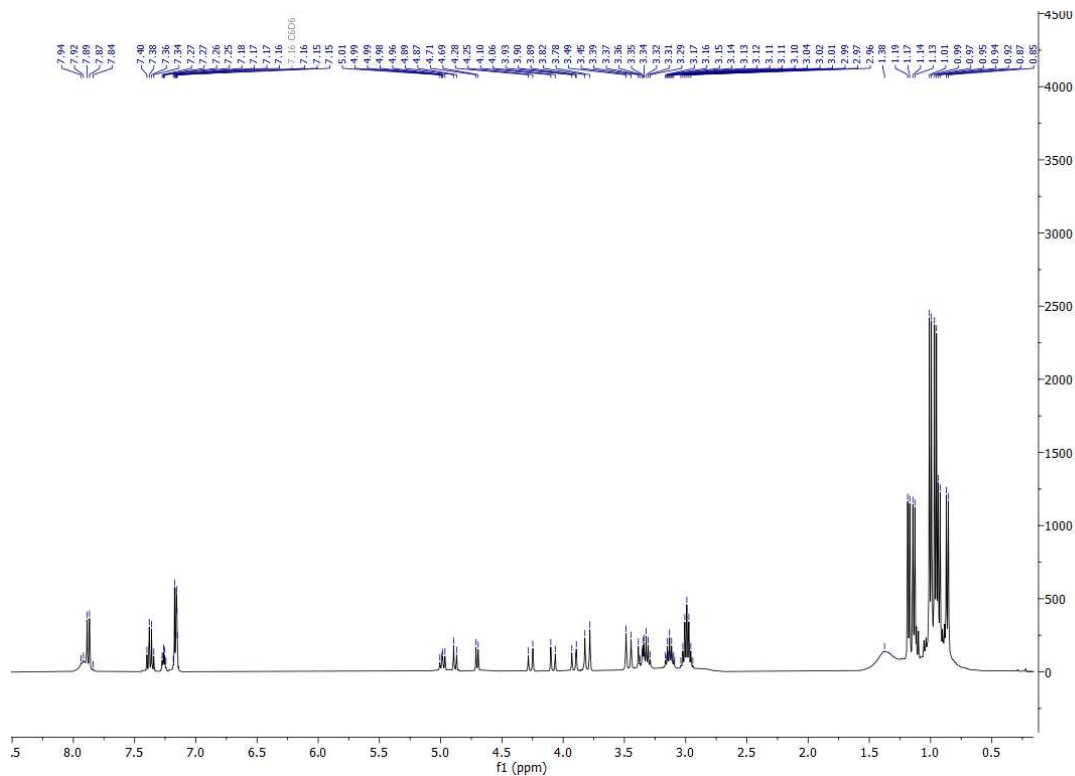

**Figure s3.**  $^1\text{H}$  NMR spectrum of  $(\text{Ar}^{\text{NiPr}_2})\text{GeGe}(\text{Ar}^{\text{NiPr}_2})(\text{H})\text{Ge}(\text{Ar}^{\text{NiPr}_2})(\text{H})_2$  measured in benzene- $d_6$  at 298 K.

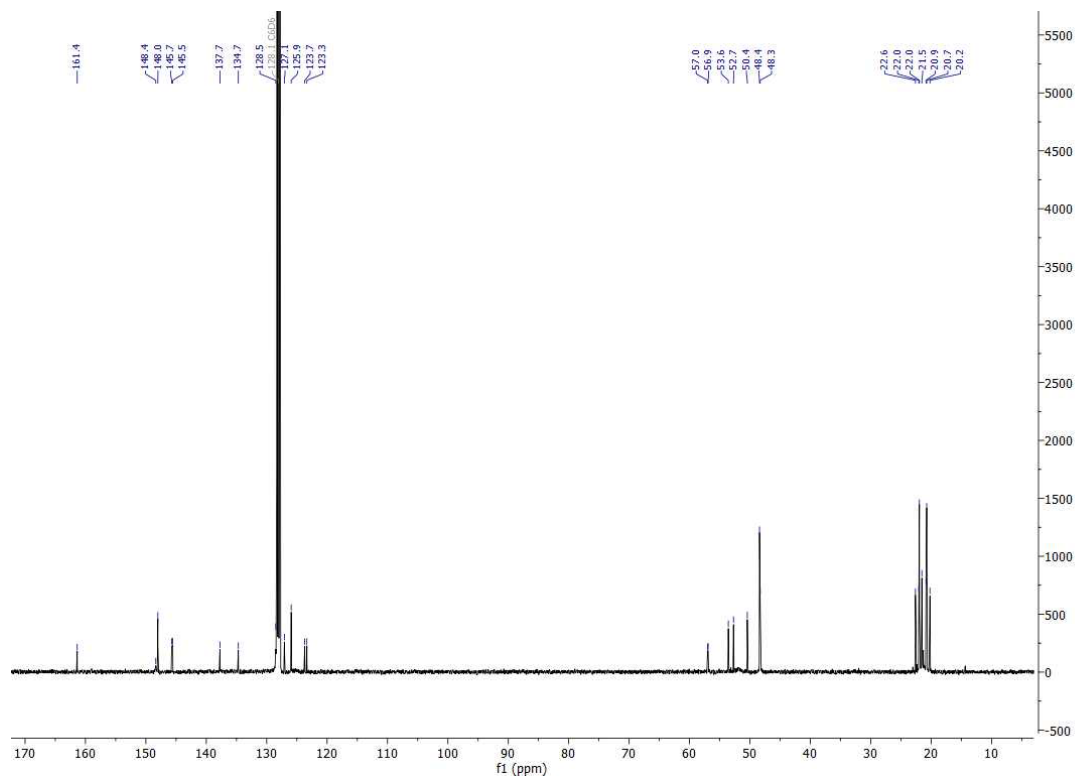

**Figure s4.**  $^{13}\text{C}\{^1\text{H}\}$  NMR spectrum of  $(\text{Ar}^{\text{NiPr}_2})\text{GeGe}(\text{Ar}^{\text{NiPr}_2})(\text{H})\text{Ge}(\text{Ar}^{\text{NiPr}_2})(\text{H})_2$  measured in benzene- $d_6$  at 298 K.

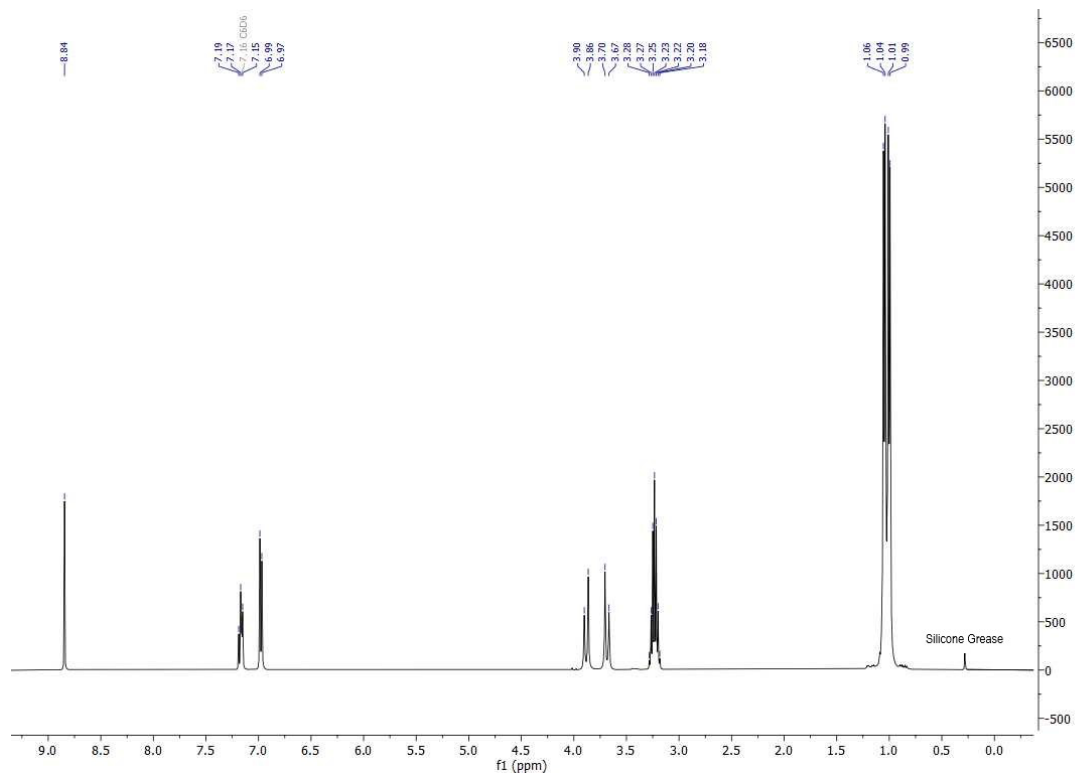

**Figure s5.**  $^1\text{H}$  NMR spectrum of  $\text{Ar}^{\text{NiPr}_2}\text{Ge}\{\text{OC}(\text{O})\text{H}\}$  measured in benzene- $\text{d}_6$  at 298 K. Silicone grease impurity has been labelled.

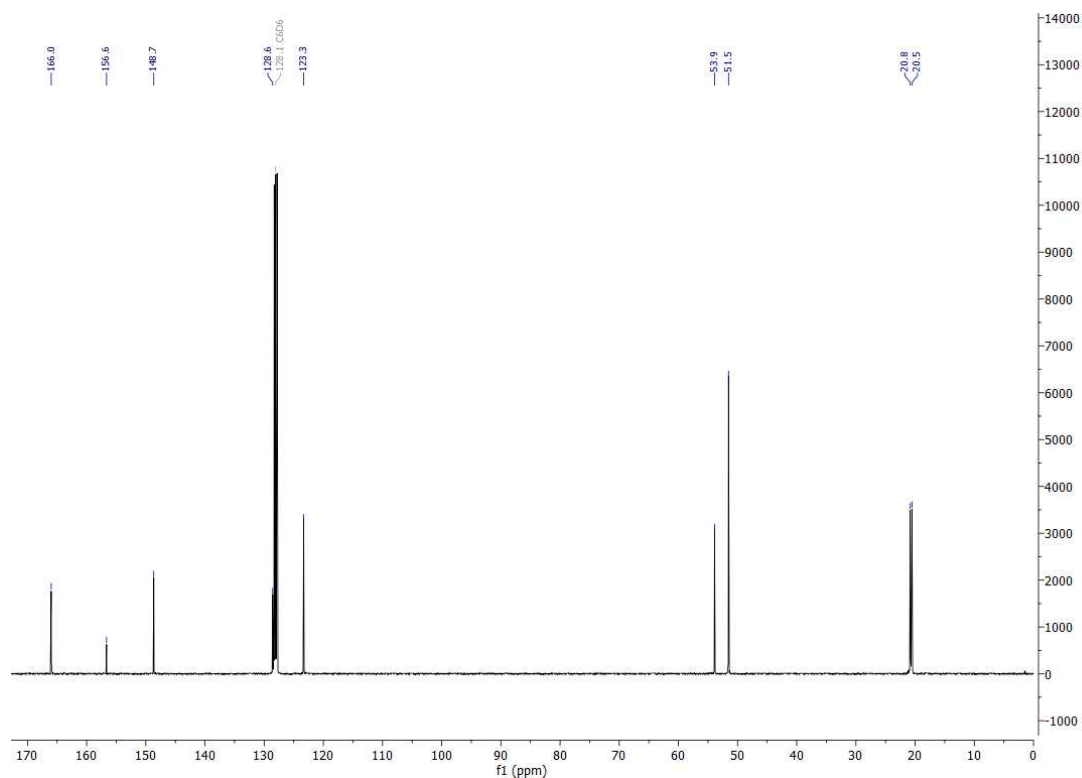

**Figure s6.**  $^{13}\text{C}\{^1\text{H}\}$  NMR spectrum of  $\text{Ar}^{\text{NiPr}_2}\text{Ge}\{\text{OC}(\text{O})\text{H}\}$  measured in benzene- $\text{d}_6$  at 298 K.



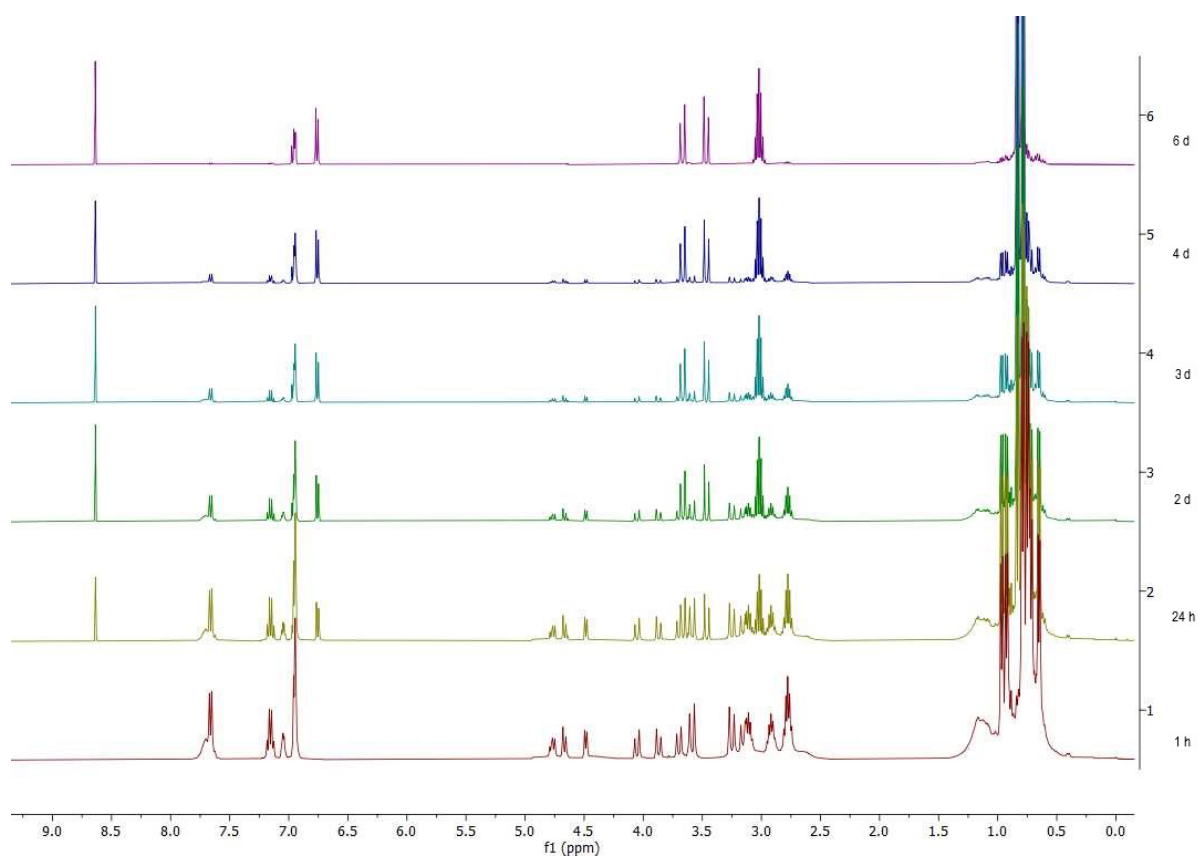

**Figure s7.** A stack plot of <sup>1</sup>H NMR spectra showing the progression of the reaction of  $(\text{Ar}^{\text{NiPr}_2})\text{GeGe}(\text{Ar}^{\text{NiPr}_2})(\text{H})\text{Ge}(\text{Ar}^{\text{NiPr}_2})(\text{H})_2$  (**2**) with  $\text{CO}_2$  to yield  $\text{Ar}^{\text{NiPr}_2}\text{Ge}\{\text{OC}(\text{O})\text{H}\}$  (**4**).

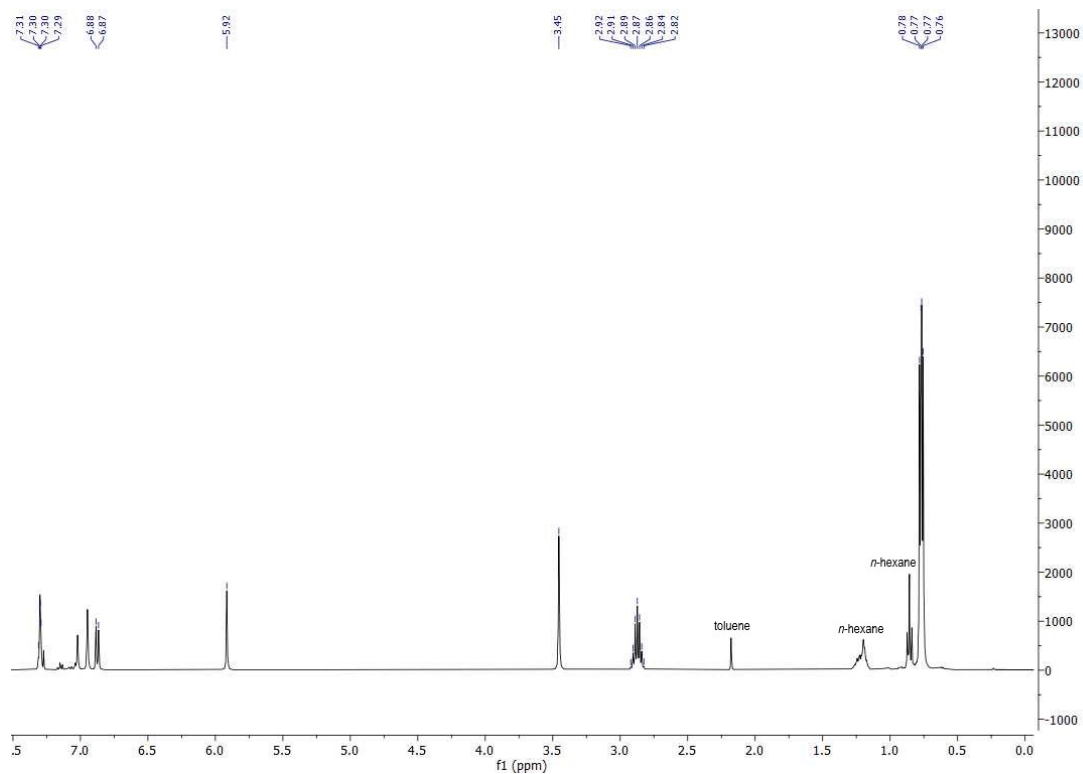

**Figure s8.**  $^1\text{H}$  NMR spectrum of  $[\text{Ar}^{\text{NiPr}_2}\text{Ge}(\text{H})_2][\text{B}(\text{C}_6\text{F}_5)_4]$  measured in bromobenzene- $d_5$  at 298 K. *N*-hexane and toluene impurities have been labelled. The *n*-hexane solvent is included within crystals of the hemi-solvate.

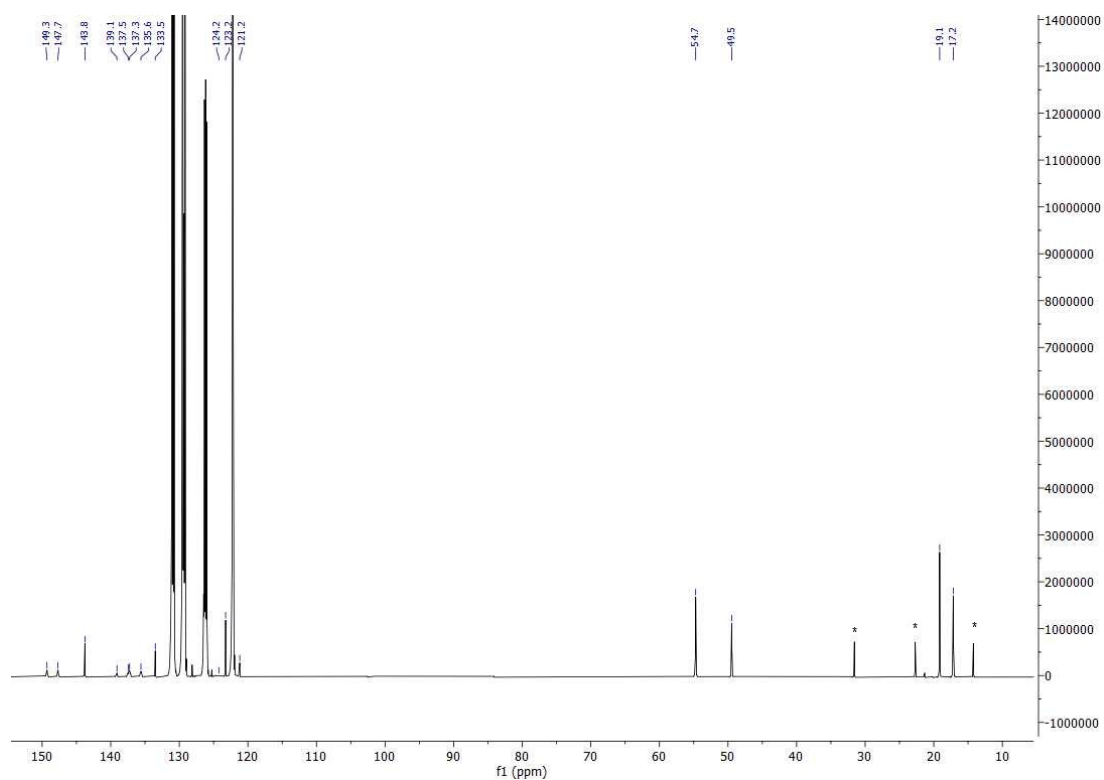

**Figure s9.**  $^{13}\text{C}\{^1\text{H}\}$  NMR spectrum of  $[\text{Ar}^{\text{NiPr}_2}\text{Ge}(\text{H})_2][\text{B}(\text{C}_6\text{F}_5)_4]$  measured in bromobenzene- $d_5$  at 298 K. Resonances marked with a \* correspond to the resonances for the *n*-hexane solvent included within crystals of the hemi-solvate.

**(v) X-ray crystallographic studies**

**Crystallographic details:** Single-crystal X-ray diffraction data were collected using an Oxford Diffraction Supernova dual-source diffractometer equipped with a 135 mm Atlas CCD area detector. Crystals were selected under Paratone-N oil, mounted on Micromount loops and quench-cooled using an Oxford Cryosystems open flow N<sub>2</sub> cooling device.<sup>s4</sup> Data were collected at 150 K using mirror monochromated Cu K<sub>α</sub> radiation ( $\lambda = 1.5418 \text{ \AA}$ ; Oxford Diffraction Supernova). Data collected were processed using the CrysAlisPro package, including unit cell parameter refinement and inter-frame scaling (which was carried out using SCALE3 ABSPACK within CrysAlisPro).<sup>s5</sup> Equivalent reflections were merged and diffraction patterns processed with the CrysAlisPro suite. Structures were subsequently solved using SHELXT-2018 and refined on F<sup>2</sup> using the SHELXL 2019 package and the graphical interface Olex2.<sup>s6-s8</sup>

**Table s1.** Selected X-ray data collection and refinement parameters for compounds **2** - **5**.

|                                            | (Ar <sup>NiPr2</sup> )GeGe(Ar <sup>NiPr2</sup> )(H)Ge(Ar <sup>NiPr2</sup> )(H) <sub>2</sub><br><b>2</b> | Ar <sup>NiPr2</sup> Ge(ONaph)<br><b>3</b>          | Ar <sup>NiPr2</sup> Ge{OC(O)H}<br><b>4</b>                      |
|--------------------------------------------|---------------------------------------------------------------------------------------------------------|----------------------------------------------------|-----------------------------------------------------------------|
| Formula                                    | C <sub>60</sub> H <sub>108</sub> Ge <sub>3</sub> N <sub>6</sub>                                         | C <sub>30</sub> H <sub>42</sub> GeN <sub>2</sub> O | C <sub>21</sub> H <sub>36</sub> GeN <sub>2</sub> O <sub>2</sub> |
| Fw (g mol <sup>-1</sup> )                  | 1131.29                                                                                                 | 519.24                                             | 421.11                                                          |
| Cell setting                               | Monoclinic                                                                                              | Triclinic                                          | Monoclinic                                                      |
| Space group                                | <i>P</i> 2 <sub>1</sub> / <i>n</i>                                                                      | <i>P</i> -1                                        | <i>P</i> 2 <sub>1</sub> / <i>n</i>                              |
| <i>a</i> (Å)                               | 15.4003(2)                                                                                              | 8.2011(3)                                          | 14.3981(2)                                                      |
| <i>b</i> (Å)                               | 14.5568(2)                                                                                              | 10.5814(6)                                         | 11.37830(10)                                                    |
| <i>c</i> (Å)                               | 29.3234(3)                                                                                              | 16.5784(5)                                         | 14.8745(2)                                                      |
| $\alpha$ (°)                               | 90                                                                                                      | 102.491(3)                                         | 90                                                              |
| $\beta$ (°)                                | 105.1050(10)                                                                                            | 100.285(3)                                         | 118.729(2)                                                      |
| $\gamma$ (°)                               | 90                                                                                                      | 93.091(4)                                          | 90                                                              |
| <i>V</i> (Å <sup>3</sup> )                 | 6346.57(14)                                                                                             | 1375.61(10)                                        | 2136.86(6)                                                      |
| <i>Z</i>                                   | 4                                                                                                       | 2                                                  | 4                                                               |
| $\rho_{\text{calc}}$ (g cm <sup>-3</sup> ) | 1.184                                                                                                   | 1.254                                              | 1.309                                                           |
| Radiation, $\lambda$ (Å)                   | Cu K $\alpha$ (1.54184)                                                                                 | Cu K $\alpha$ (1.54184)                            | Cu K $\alpha$ (1.54184)                                         |
| $\mu$ (mm <sup>-1</sup> )                  | 1.958                                                                                                   | 1.681                                              | 2.069                                                           |
| Reflns collected                           | 51734                                                                                                   | 13167                                              | 21768                                                           |
| Independent reflns                         | 13268                                                                                                   | 5678                                               | 4443                                                            |
| $R_{\text{(int)}}$                         | 0.0306                                                                                                  | 0.0274                                             | 0.0330                                                          |
| Parameters                                 | 655                                                                                                     | 383                                                | 243                                                             |
| $R_1$ (all data/ $I > 2\sigma(I)$ )        | 0.0316/0.0257                                                                                           | 0.0299/0.0283                                      | 0.0310/0.0260                                                   |
| $\omega R_2$ (all data/ $I > 2\sigma(I)$ ) | 0.0658/0.0625                                                                                           | 0.0744/0.0727                                      | 0.0695/0.0658                                                   |
| GooF                                       | 1.032                                                                                                   | 1.044                                              | 1.028                                                           |
| <i>T</i> /K                                | 150.0(2)                                                                                                | 150.0(2)                                           | 150.0(2)                                                        |
| CCDC ref.                                  | 2242325                                                                                                 | 2242326                                            | 2242237                                                         |

**Table S1 (cont).** Selected X-ray data collection and refinement parameters for compounds **2 - 5**.

| [(Ar <sup>NiPr2</sup> Ge(H) <sub>2</sub> ][B(C <sub>6</sub> F <sub>5</sub> ) <sub>4</sub> ] <sub>0.5</sub> (C <sub>6</sub> H <sub>14</sub> )<br><b>5</b> |                                                                                                                                         |
|----------------------------------------------------------------------------------------------------------------------------------------------------------|-----------------------------------------------------------------------------------------------------------------------------------------|
| Formula                                                                                                                                                  | [C <sub>20</sub> H <sub>37</sub> GeN <sub>2</sub> ][BC <sub>24</sub> F <sub>20</sub> ] <sub>0.5</sub> (C <sub>6</sub> H <sub>14</sub> ) |
| Fw (g mol <sup>-1</sup> )                                                                                                                                | 1100.24                                                                                                                                 |
| Cell setting                                                                                                                                             | Orthorhombic                                                                                                                            |
| Space group                                                                                                                                              | <i>P b c a</i>                                                                                                                          |
| <i>a</i> (Å)                                                                                                                                             | 18.1855(2)                                                                                                                              |
| <i>b</i> (Å)                                                                                                                                             | 22.2471(3)                                                                                                                              |
| <i>c</i> (Å)                                                                                                                                             | 22.8462(3)                                                                                                                              |
| $\alpha$ (°)                                                                                                                                             | 90                                                                                                                                      |
| $\beta$ (°)                                                                                                                                              | 90                                                                                                                                      |
| $\gamma$ (°)                                                                                                                                             | 90                                                                                                                                      |
| <i>V</i> (Å <sup>3</sup> )                                                                                                                               | 9243.0(2)                                                                                                                               |
| <i>Z</i>                                                                                                                                                 | 8                                                                                                                                       |
| $\rho_{\text{calc}}$ (g cm <sup>-3</sup> )                                                                                                               | 1.581                                                                                                                                   |
| Radiation, $\lambda$ (Å)                                                                                                                                 | Cu K $\alpha$ (1.54184)                                                                                                                 |
| $\mu$ (mm <sup>-1</sup> )                                                                                                                                | 1.973                                                                                                                                   |
| Refins collected                                                                                                                                         | 64509                                                                                                                                   |
| Independent refins                                                                                                                                       | 9607                                                                                                                                    |
| <i>R</i> <sub>(int)</sub>                                                                                                                                | 0.0469                                                                                                                                  |
| Parameters                                                                                                                                               | 657                                                                                                                                     |
| <i>R</i> <sub>1</sub> (all data/ <i>I</i> > 2 $\sigma$ ( <i>I</i> ))                                                                                     | 0.0457/0.0308                                                                                                                           |
| $\omega R$ <sub>2</sub> (all data/ <i>I</i> > 2 $\sigma$ ( <i>I</i> ))                                                                                   | 0.0815/0.0734                                                                                                                           |
| GooF                                                                                                                                                     | 1.016                                                                                                                                   |
| <i>T</i> /K                                                                                                                                              | 150.0(2)                                                                                                                                |
| CCDC Deposition No.                                                                                                                                      | 2242328                                                                                                                                 |

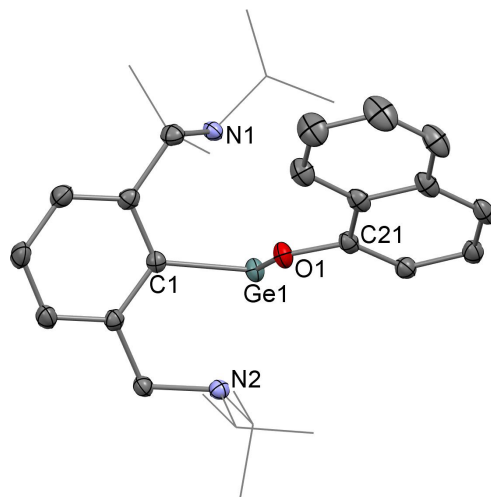

**Figure s10.** The molecular structures of  $\text{Ar}^{\text{NiPr}_2}\text{Ge}(\text{ONaph})$  (**3**) in the solid state as determined by X-ray crystallography. Thermal ellipsoids set at the 40% probability level. Selected hydrogen atoms omitted and  $i\text{Pr}$  substituents shown in wireframe format for clarity. Selected bond lengths (Å) and angles ( $^\circ$ ): Ge1–O1 1.9049(10), Ge1–C1 1.9968(13), O1–C21 1.3478(16), Ge1–N1 2.836(3), Ge1–N2 2.426(1), O1–Ge1–C1 90.53(5), C21–O1–Ge1 123.80(9).

**(vi) References**

- s1 C. Bibal, S. Mazières, H. Gornitzka and C. Couret, *Polyhedron*, 2002, **21**, 2827–2834.
- s2 E. A. Romero, J. L. Peltier, R. Jazzar and G. Bertrand, *Chem. Commun.*, 2016, **52**, 10563–10565.
- s3 S. Bontemps and S. Sabo-Etienne, *Angew. Chem. Int. Ed.*, 2013, **52**, 10253–10255.
- s4 J. Cosier and A. M. Glazer, *J. Appl. Cryst.*, 1986, **19**, 105-107.
- s5 CrysAlisPRO, Oxford Diffraction/Agilent Technologies UK Ltd, Yarnton, UK.
- s6 G. M. Sheldrick, *Acta Cryst.*, 2015, **A71**, 3-8.
- s7 G. M. Sheldrick, *Acta Cryst.*, 2015, **C71**, 3-8.
- s8 O. V. Dolomanov, L. J. Bourhis, R. J. Gildea, J. A. K. Howard and H. Puschmann. *J. Appl. Cryst.*, 2009, **42**, 339-341.
